# Supplementary material for: The dynamic three-dimensional organization of the diploid yeast genome
Source: eLife journal article supplement (doi:10.7554/elife.23623), 2017-05-24
Supplement: supp [file elife-23623-supp-v1.zip]

Non-pairing (glucose)

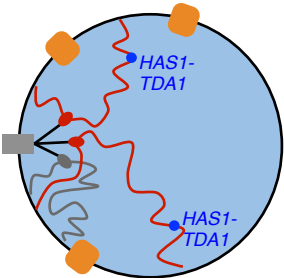

Pairing (galactose, saturated)

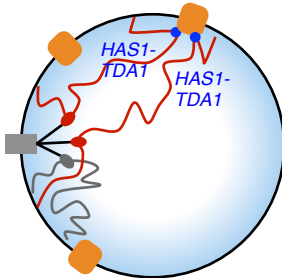

-  NPC
-  CEN
-  chrXIII
-  other chr
-  SPB
-  Space explored by *HAS1-TDA1*
