# Supplementary material for: The dynamic three-dimensional organization of the diploid yeast genome
Source: eLife. 2017 May 24;6:e23623. doi: 10.7554/eLife.23623 (PMC5476426; doi:10.7554/eLife.23623)
Supplement: Supplementary file 1. — DOI: http://dx.doi.org/10.7554/eLife.23623.025 [file elife-23623-supp1.docx]

**Supplementary file 1. Strains used in this study.**

| **Strain** | **Description** | **Source** |
| --- | --- | --- |
| FY5 (DBY11070) | *S. cerevisiae* *MAT* | F. Winston |
| FY69 (YMD857) | *S. cerevisiae* *MAT***a** *leu21* | F. Winston |
| FY2 (DBY7283) | *S. cerevisiae* *MAT* *ura3-52* *GAL*+ | F. Winston |
| BY4741 (YMD2177) | *S. cerevisiae* *MATa his31 leu20 met150 ura30* | SGRP |
| BY4742 (YMD2220) | *S. cerevisiae* *MAT* *his31 leu20 lys20 ura30* | S. Fields |
| YMD1797 | *S. cerevisiae* *MAT* *leu21* | C. Payen |
| YZB5-113 (YMD377) | *S. uvarum* *MAT* *ho::HygR* *lys2-1* *ura3::NatR* | Y. Zheng |
| YDG613 | *S. paradoxus* *MAT***a**/ | D. Greig |
| ILY376 (YMD3258) | *S. uvarum* *MAT***a** *ho::KanR* *ura3::NatR LYS* | This study |
| Y12 (YMD1182) | *S. cerevisiae* *MAT***a** | J. Andrie (SGRP) |
| DBVPG6044 (YMD2218) | *S. cerevisiae* *MAT* | J. Andrie (SGRP) |
| Nup60-TAP | *S. cerevisiae MATa* BY4741 *NUP60-TAP <HIS>* | (Ghaemmaghami et al., 2003) |
| ILY456 (YMD3259) | *S. cerevisiae* (*MAT*) x *S. uvarum* (*MAT***a**) *Su ho::KanR Su ura3* | This study |
| YMD3263 | *S. uvarum* (*MAT***a**) ILY376 x *S. cerevisiae* (*MAT*) BY4742 t(ScV;ScXII)(*YER151C*-*YER152C*;*YLR150W*-*YLR151C*) *ScYLR150W*-*ScYLR151C:HygR*-*URA3L*-*AI*-*lox*-*AI*-*URA3R*-*NatR* *ScYER151C*-*ScYER152C:lox** | This study |
| YMD3264 | *S. cerevisiae* (*MAT*) YMD1797 x *S. paradoxus* (*MAT***a**) sporulated YDG613 | This study |
| YMD3265 | *S. paradoxus* (*MAT***a**) sporulated YDG613 x *S. uvarum* (*MAT*) YZB5-113 | This study |
| YMD3266 | *S. cerevisiae* (*MAT*) x *S. uvarum* (*MAT***a**) ILY456 *Sc ngl2-ymr295c::HygR* | This study |
| YMD3267 | *S. cerevisiae* (*MAT*) x *S. uvarum* (*MAT***a**) ILY456 *Sc has1::HygR* | This study |
| YMD3268 | *S. cerevisiae* (*MAT*) x *S. uvarum* (*MAT***a**) ILY456 *Sc has1coding::HygR* | This study |
| YMD3269 | *S. cerevisiae* (*MAT*) x *S. uvarum* (*MAT***a**) ILY456 *Sc has1pr::HygR* | This study |
| YMD3270 | *S. cerevisiae* (*MAT*) x *S. uvarum* (*MAT***a**) ILY456 *Sc has1pr::HygR* *YNL266W*-*YNL267W*::*HAS1pr*-*TDA1pr*-*NatR* | This study |
| YMD3271 | *S. cerevisiae* Y12 (*MAT***a**) x *S. cerevisiae* DBVPG6044 (*MAT*) | J. Andrie |
| YMD3377 | *S. cerevisiae* YMD1797 (*MAT*) x *S. uvarum* ILY376 (*MATa*) *Sc nup2::HygR Sb nup2::HygR* | This study |
| DBY827 | *S. cerevisiae MAT***a** *ade2-1 can1-100 his3-11,15 leu2-3,112 trp1-1 ura3-1 ADE2 HIS3:pAFS144 TRP1:pER04 HAS1:p6LacO128-HAS1* | This study |
| DBY828 | *S. cerevisiae MAT* *ade2-1 can1-100 his3-11,15 leu2-3,112 trp1-1 ura3-1 ADE2 LEU2:p5LacI-GFP TRP1:pER04 HAS1:p6LacO128-HAS1* | This study |
| DBY830 | *S. cerevisiae MAT***a** *ade2-1 can1-100 his3-11,15 leu2-3,112 trp1-1 ura3-1 ADE2 mlp2::KanR HIS3:pAFS144 TRP1:pER04 HAS1:p6LacO128-HAS1* | This study |
| DBY831 | *S. cerevisiae MAT***a***/* *ADE2/ade2-1 can1-100/can1-100 HIS3:LacI-GFP/his3-11,15 LEU2:p5LacI-GFP/ leu2-3,112 TRP1:pER04 TRP1:pER04 ura3-1/ura3-1 HAS1:p6LacO128-HAS1/HAS1:p6LacO128-HAS1* | This study |
| DBY832 | *S. cerevisiae MAT***a** *ade2-1 can1-100 his3-11,15 leu2-3,112 trp1-1 ura3-1 nup100::KanR HIS3:pAFS144 TRP1:pER04 HAS1:p6LacO128-HAS1* | This study |
| DBY834 | *S. cerevisiae MAT***a** *ade2-1 can1-100 his3-11,15 leu2-3,112 trp1-1 ura3-1 nup2:: KanR HIS3:pAFS144 TRP1:pER04 HAS1:p6LacO128-HAS1* | This study |

SGRP, *Saccharomyces* Genome Resequencing Project (Liti et al., 2009)
