# Supplementary material for: The dynamic three-dimensional organization of the diploid yeast genome
Source: eLife. 2017 May 24;6:e23623. doi: 10.7554/eLife.23623 (PMC5476426; doi:10.7554/eLife.23623)
Supplement: Supplementary file 2. — DOI: http://dx.doi.org/10.7554/eLife.23623.026 [file elife-23623-supp2.xlsx]

## Sheet: Sheet1
Name	Sequence	Use
Sbay3Rtel_F	CATTCCCATTTGTTGATTCCTG	Revising S. uvarum reference genome
Sbay3Ltel_R	GGATTCTATTGTTGCTAAAGGC	Revising S. uvarum reference genome
hphMX_5_R	CATCGGCGCAGCTATTTACC	Verification of construct insertion
hphMX_3_F	ACTCGCCGATAGTGGAAACC	Verification of construct insertion
natMX_5_R	GTAAGCCGTGTCGTCAAGAG	Verification of construct insertion
natMX_3_F	CTCTACATGAGCATGCCCTG	Verification of construct insertion
URA3R_R	TTGTACTTGGCGGATAATGC	Verification of construct insertion
URA3_F	CTTGTCTGTAAGCGGATGCC	Verification of construct insertion
URA3_R	GAACAACACTCAACCCTATCTCG	Verification of construct insertion
ScYLR150-151-hph_F	AGTCATTCTTCATTAAAAACTTTTTGTTATCCAGTATAGCGACCAGCATTCACATA	Generating ScV-ScXII translocation strain
ScYLR150-151-lox71-hphMX-UR_R	AGAATCATACTGGATGTCCTTAATCATAACTTCGTATAATGTATGCTATACGAACGGTACCGATATCGGATCCGT	Generating ScV-ScXII translocation strain
ScYER151-152-lox66-A3-natMX_F	CGGTACCTGGATGATGGTAGATAACTTCGTATAGCATACATTATACGAACGGTACCGATATCAGATCTAAGCTTGA	Generating ScV-ScXII translocation strain
ScYER151-152-nat_R	TTTTAATAGTAAGTCAGACTCGTCTGCGACATGGAGGCCCAGAATACCCTC	Generating ScV-ScXII translocation strain
ScYLR150-151_HA-L	TCACTTCTGAGATGTGCAAGCGTGTAGTTTGTTTGTATTTGTATAACAATTTCATCATTAGTCATTCTTCATTAAAAACTTTTTGTTATC	Generating ScV-ScXII translocation strain
ScYLR150-151_HA-R	AAAAAAACTGTGGTATAATGCGTTGCCTAACAATACTCTCAAGAGATAATCAAGATGAGAGAAAAAGAATCATACTGGATGTCCTTAATC	Generating ScV-ScXII translocation strain
ScYER151-152_HA-L	ACATCGAGTACGACTCTTCTTTGTTAGCGTCTTGCATGTTCATTTTTTTTAATGATGATGGAAAGGAAAGCGGTACCTGGATGATGGTAG	Generating ScV-ScXII translocation strain
ScYER151-152_HA-R	TGATAAAACAAACAAGCAGCGAAAAAGCGAAAGGGAAGAGAAGTGTTTCTAGAGAAGAAAGTCATTTTAATAGTAAGTCAGACTCGTCTG	Generating ScV-ScXII translocation strain
ScYLR150-151_valF	GTGACAGAAACAACAACAGCAG	Validating ScV-ScXII translocation strain
ScYLR150-151_valR	AACCGAACGGAAGAAGTGAATG	Validating ScV-ScXII translocation strain
ScYER151-152_valF	ATCTGCATATTGGTTGGCGTAG	Validating ScV-ScXII translocation strain
ScYER151-152_valR	ATTGAGCTGTTTGGTGCTGTTTG	Validating ScV-ScXII translocation strain
ScYMR285_HA-L-MX_F	CAAGATATTTATGCACGACAGTAATCGACATGGAGGCCCAGAATACCCTC	Generating ngl2-ymr295c deletion strain
ScYMR296_HA-R-MX_R	CTGTTGCCAAGAATCTAATAAATAAATCAGTATAGCGACCAGCATTCACATA	Generating ngl2-ymr295c deletion strain
ScYMR285_HA-L	ATTTGATGTAATATTTATTATTAAGAACTTTTGTCGTGCTAAACGTTGTACTGTACAACTATTAGCAAGATATTTATGCACGACAGTAAT	Generating ngl2-ymr295c deletion strain
ScYMR296_HA-R	AACGCCGCCATGTCCCCAGAGGAACTCAAAAATGCTTGCGAAAGTGTCAAGCAGTCCATCCTTGCCTGTTGCCAAGAATCTAATAAATAA	Generating ngl2-ymr295c deletion strain
ScYMR285_valF	AAGATCCAATCATCCAAAGG	Validating ngl2-ymr295c deletion strain
ScYMR285_valF2	AAGACAGAATGATGCGTGAG	Validating ngl2-ymr295c deletion strain
ScYMR296_valR	CATTGAGCCATACGAAGAGG	Validating ngl2-ymr295c deletion strain
ScYMR296_valR2	ATATAGGTCTCGCAAGTTCG	Validating ngl2-ymr295c deletion strain
ScYMR289_HA-L-MX_F	GGGAACAGTGAAGACAAAATATTGACGACATGGAGGCCCAGAATACCCTC	Generating has1 deletion strains
ScYMR291_HA-R-MX_R	AAGCAGAAGAACTAGCTGTAGTCATATCAGTATAGCGACCAGCATTCACATA	Generating has1 deletion strains
ScYMR289_HA-L	GATATAGGAAGCCTTACCGTTGGCAACGAAGTTTTGCTTTTCAATGGCGTCATGGGATGCATAAAGGGAACAGTGAAGACAAAATATTGA	Generating has1 deletion strains
ScYMR291_HA-R	GTCTGCATTGCTGCCACTCAGTTGCGGCCAAGGTTTTTCTTCCGGCAGGCGCTGTTGTAGCTGGGAAGCAGAAGAACTAGCTGTAGTCAT	Generating has1 deletion strains
ScYMR290_HA-L-MX_F	GTTTATTTGACGGGGTAGCCATCGACATGGAGGCCCAGAATACCCTC	Generating has1 deletion strains
ScYMR290_HA-R-MX_R	GCTGAGCAATATTAACAGGAGAAGTATCAGTATAGCGACCAGCATTCACATA	Generating has1 deletion strains
ScYMR290_HA-L	ATTGTTTTGTTTTGAAGTGCTCTTTTCATCTACTACAGGTTCTTCTGTAGATTCAGAATCTCTAGAACGTTTATTTGACGGGGTAGCCAT	Generating has1 deletion strains
ScYMR290_HA-R	ATAGTGTATACACGGTACTTGAGTACATAGCTATTGGATAACTGTATACTATAATAATTAGATAAGCTGAGCAATATTAACAGGAGAAGT	Generating has1 deletion strains
ScYMR289_valF	TGTGACACCAAGATTAGCAAC	Validating has1 deletion strains
ScYMR289_valF2	AACAAACGTGGCTGTAATTC	Validating has1 deletion strains
ScYMR291_valR	GACAATGTTATCTGCCGTCTC	Validating has1 deletion strains
ScYMR291_valR2	CATACAAATCTCCCTTCTGACAC	Validating has1 deletion strains
ScYMR290_valF	AATTCGAGGACTGGCAAATC	Validating has1 deletion strains
ScYMR290_valR	TTTGGCTGAGACAGTCGTG	Validating has1 deletion strains
MX3-ScYMR290-291inter_F	TATGTGAATGCTGGTCGCTATACTGACTTCTCCTGTTAATATTGCTCAGC	Generating ectopic HAS1pr-TDA1pr strain
ScYNL267-266_HA_F	GAACTGGAAAAACAATTTGCAAATGTCCGGAGAACAAAAAAATTGGAATTTTAGTAAAAGGAATATACATATATTTATTTATTGCCGAGA	Generating ectopic HAS1pr-TDA1pr strain
ScYNL267-266_HA_R	ATAATAATTTATATGTATGGTTAATTAACCACATATTTATTTTACTCTCATTCTTTTACCTTGCTTTTTCTGAGTCAGCTGCTCTATTAT	Generating ectopic HAS1pr-TDA1pr strain
ScYNL267-266-MX5_F	GAATATACATATATTTATTTATTGCCGAGACGACATGGAGGCCCAGAATACCCTC	Generating ectopic HAS1pr-TDA1pr strain
ScYNL267-266-ScYMR290-291inter_R	CTGAGTCAGCTGCTCTATTATTTTGGCTGAGACAGTCGTG	Generating ectopic HAS1pr-TDA1pr strain
ScNUP2_HA-L	AAGAAAGCGCAAACAATTTTCAACCTGACAAAGCATACATCATTTTTCATACAAGTCCTTGTTAAGTAACTCAAAAAAATCATTAACGAG	Generating nup2 deletion strain
ScNUP2_HA-R	AATTTTGTATTCTTTATTTGCTCAACTATAACCTTGAGCTACAAAATATGAGGGTTCTATTCTATTTAAAATTGTTAACTGTATTTACTC	Generating nup2 deletion strain
ScNUP2_HA-L-MX5_F	GTTAAGTAACTCAAAAAAATCATTAACGAGCGACATGGAGGCCCAGAATACCCTC	Generating nup2 deletion strain
ScNUP2_HA-R-MX3_R	TCTATTTAAAATTGTTAACTGTATTTACTCCAGTATAGCGACCAGCATTCACATA	Generating nup2 deletion strain
ScNUP2_valF	GCATCGTGTGGTAAACAAGC	Validating nup2 deletion strain
ScNUP2_valR	TGGGCTTCAAAAGCTGCCAAATC	Validating nup2 deletion strain
SuNUP2_HA-L	AGATGCGGATGATTTCTTACTTAACGTGAGGCATATAAAGCTTTTTTCACACAAAGACTGGTCAACAAACCCACTCAAAGCATTAGCAAG	Generating nup2 deletion strain
SuNUP2_HA-R	TAGGTTTCGTATTCTTTGTTTATATAAATATTATCCACATTAAGCTACAAAGTGTAAGTATTCTACTTTATATAGGGCTGTTCATGGTAT	Generating nup2 deletion strain
SuNUP2_HA-L-MX5_F	CAAACCCACTCAAAGCATTAGCAAGCGACATGGAGGCCCAGAATACCCTC	Generating nup2 deletion strain
SuNUP2_HA-R-MX3_R	CTTTATATAGGGCTGTTCATGGTATCAGTATAGCGACCAGCATTCACATA	Generating nup2 deletion strain
SuNUP2_valF	GCAGTGTGGTAAACAAACTTTCAG	Validating nup2 deletion strain
SuNUP2_valR	TGGGCTACAAAGACTGCCAAATC	Validating nup2 deletion strain
GAL1pr_F	ACCTTCTCTTTGGAACTTTCAGTA	ChIP-qPCR
GAL1pr_R	AGGCACATCTGCGTTTCA	ChIP-qPCR
TDA1_prom1_F	TGCGCCTATCAAATCATTTTCCAC	ChIP-qPCR
TDA1_prom1_R	GGATGATAGCAGGCGGTGAA	ChIP-qPCR
TDA1_prom2_F	TTCACCGCCTGCTATCATCC	ChIP-qPCR
TDA1_prom2_R	GCTGAAATCGGAATTTGAAGAATAGCG	ChIP-qPCR
TDA1_CDS1_F	ATGACTACAGCTAGTTCTTCTGC	ChIP-qPCR
TDA1_CDS1_R	CAAGGAGTTGTGGTTGGTTACG	ChIP-qPCR
TDA1_CDS2_F	TGTCGGTGAAATGACTCCTGATC	ChIP-qPCR
TDA1_CDS2_R	GTCAAAGGGCGTATAGCCGAAG	ChIP-qPCR
TDA1_CDS3_F	TGCAGGCACATTCGACTATCTTC	ChIP-qPCR
TDA1_CDS3_R	ACCGTTCATCAAGCTATTCTTTGG	ChIP-qPCR
HAS1_3'UTRf	GTGTACGTGGAACCAACACAACCG	Generating LacO HAS1 strain
HAS1_3'UTR​r	GACTTCAGCACGTCTCTGAATG	Generating LacO HAS1 strain
