# Supplementary figures and images for: The dynamic three-dimensional organization of the diploid yeast genome
Source: eLife journal article supplement (doi:10.7554/elife.23623), 2017-05-24

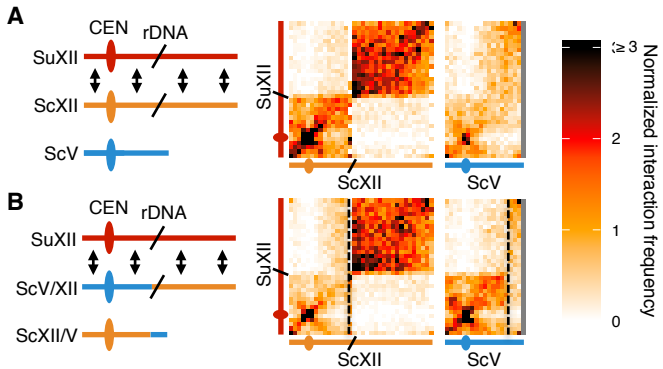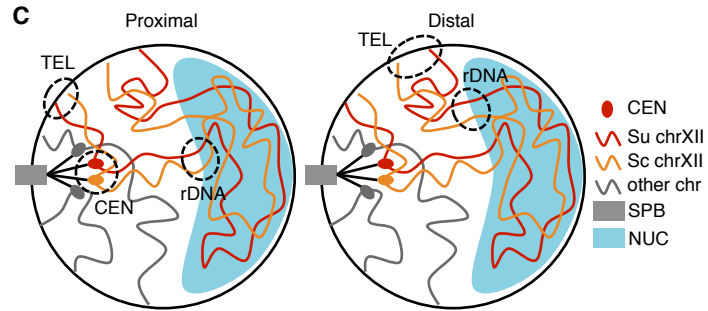

Supplement: supp [file elife-23623-supp-v1.zip]

**A**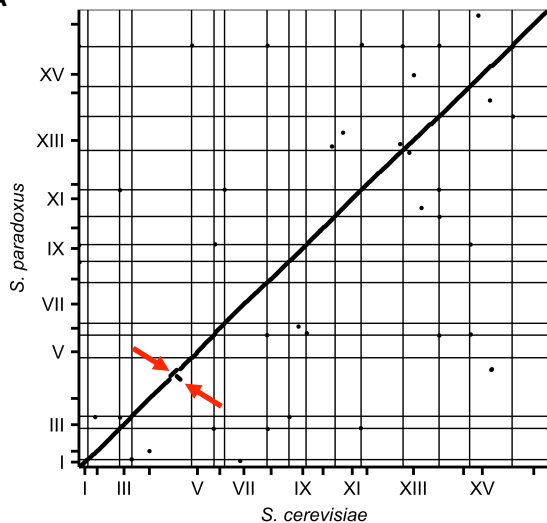**B**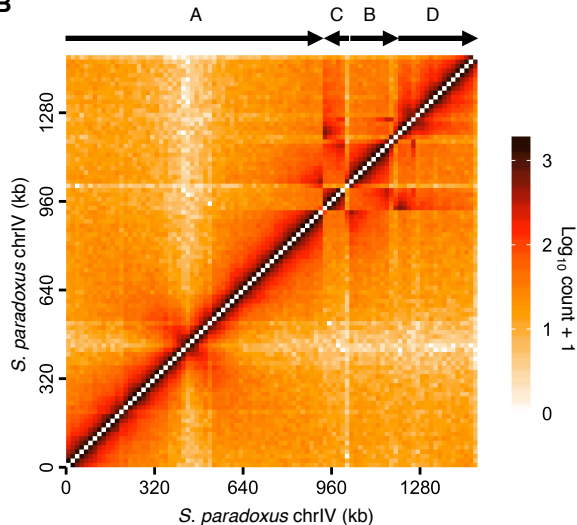**C**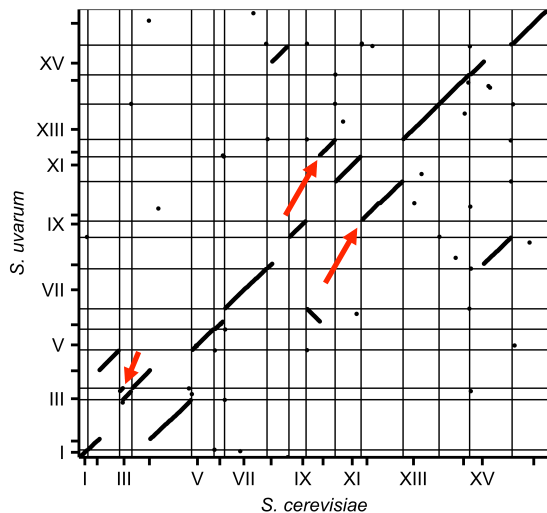**D**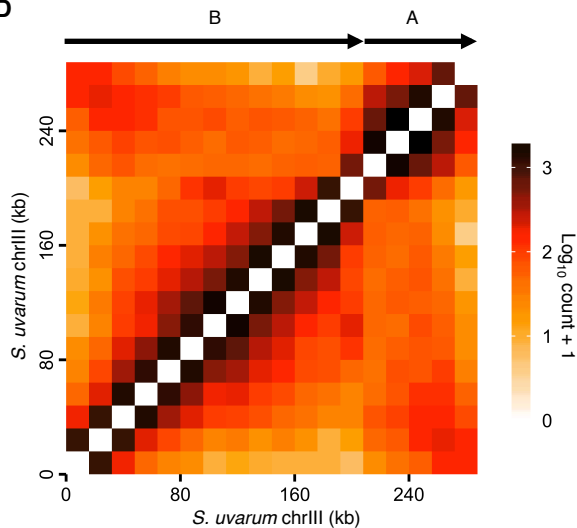

Supplement: supp [file elife-23623-supp-v1.zip]

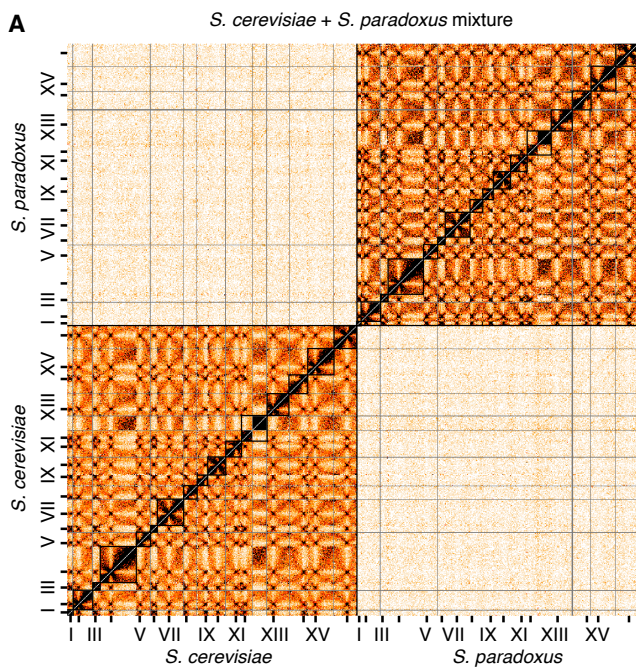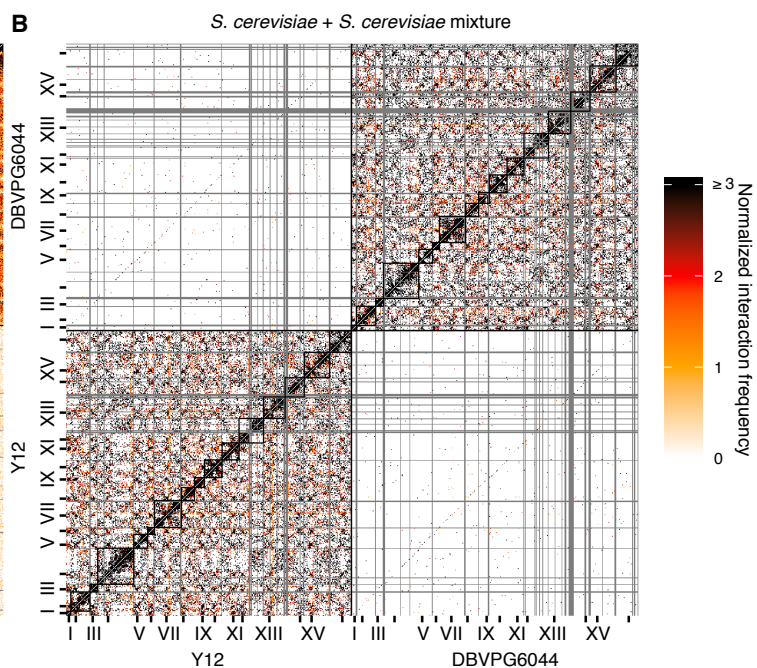

Supplement: supp [file elife-23623-supp-v1.zip]

**A**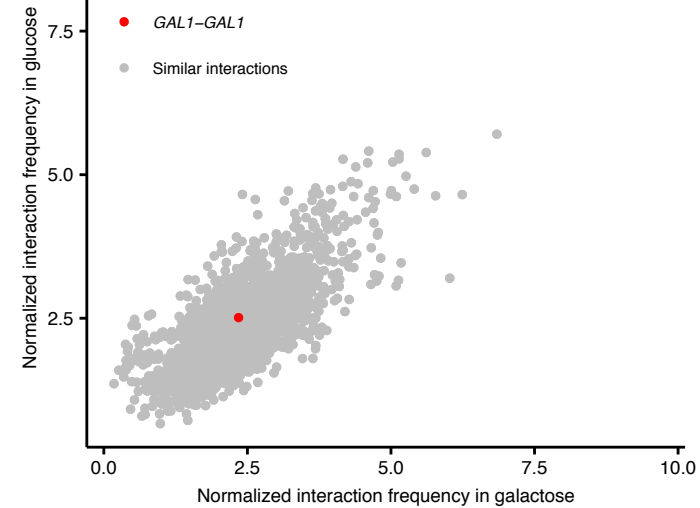**B**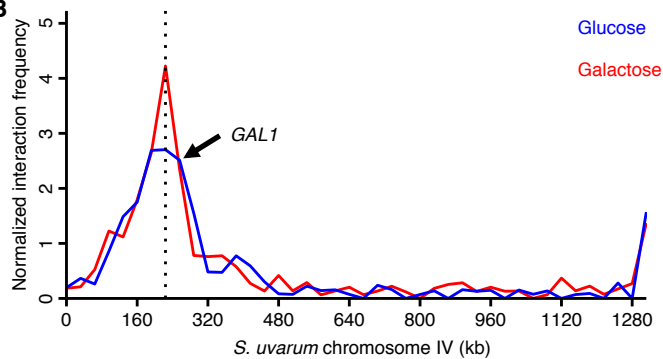**C**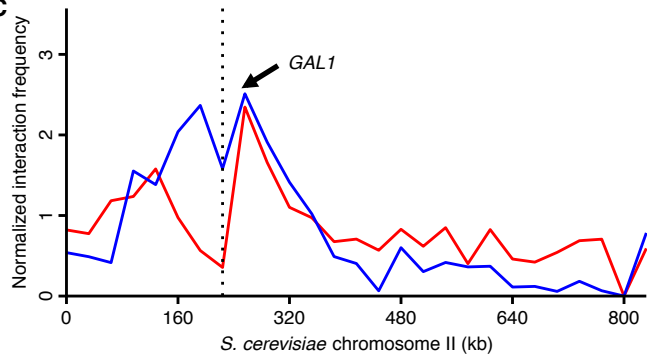

Supplement: supp [file elife-23623-supp-v1.zip]

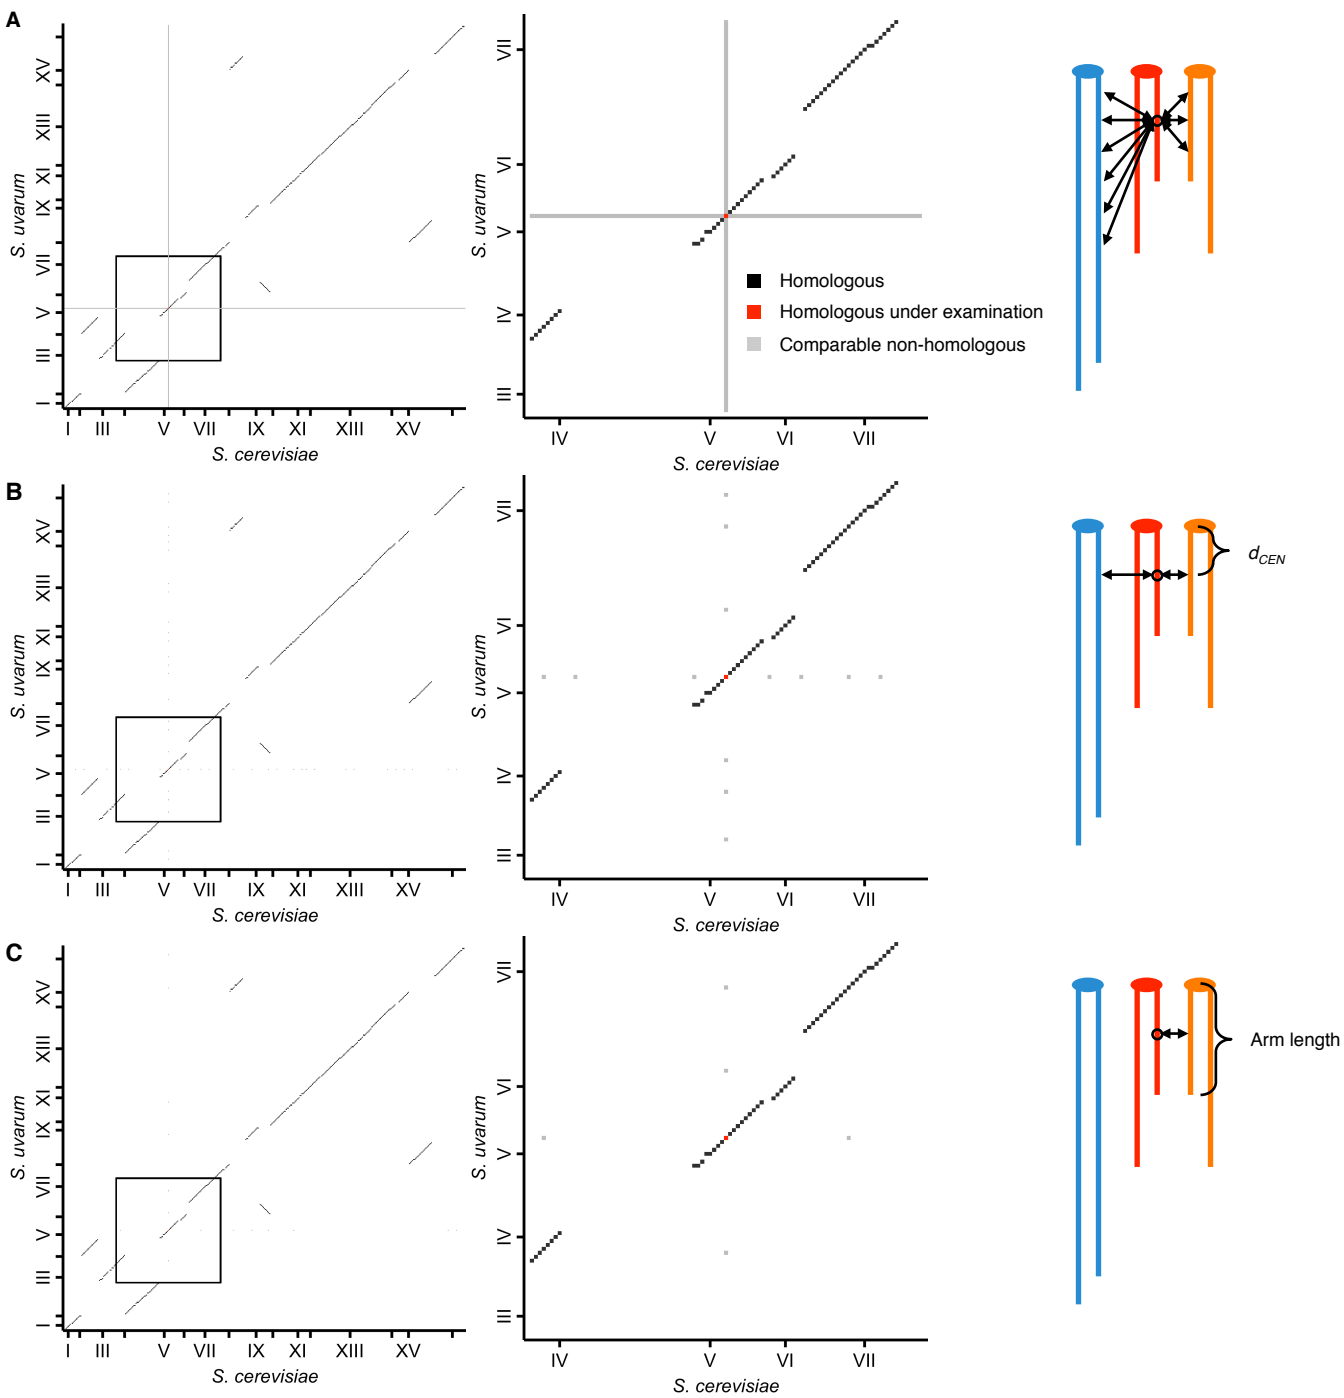

Supplement: supp [file elife-23623-supp-v1.zip]

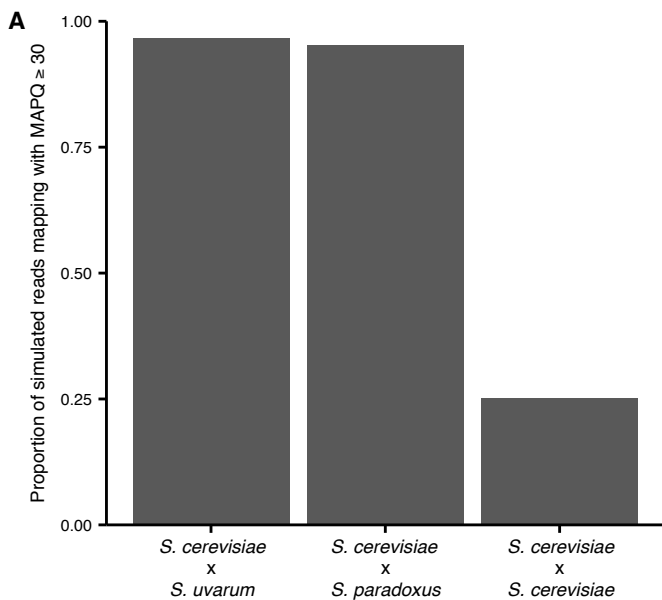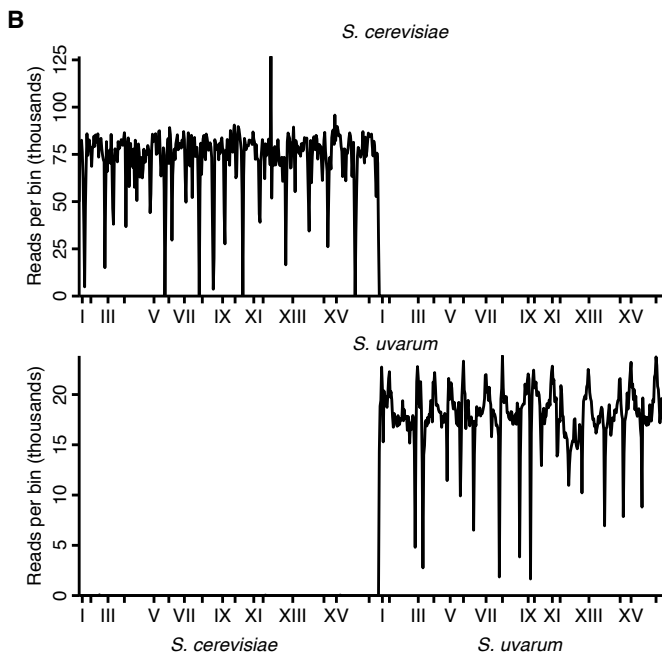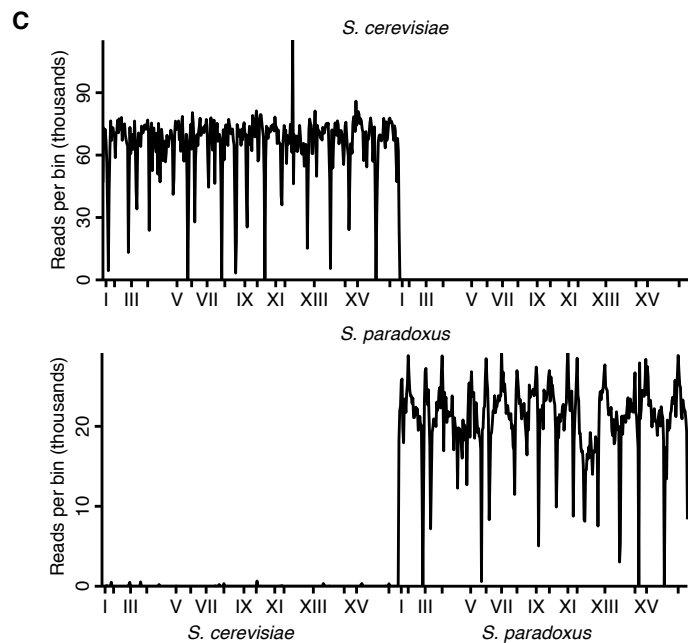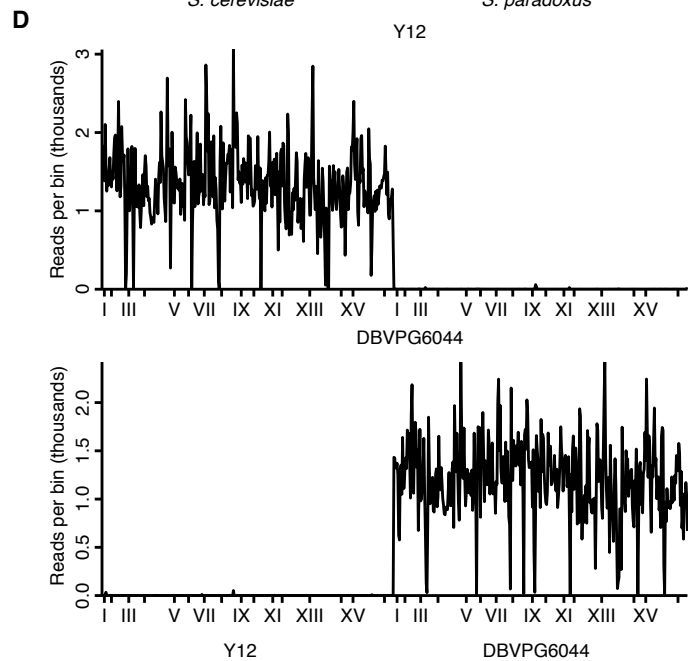

Supplement: supp [file elife-23623-supp-v1.zip]

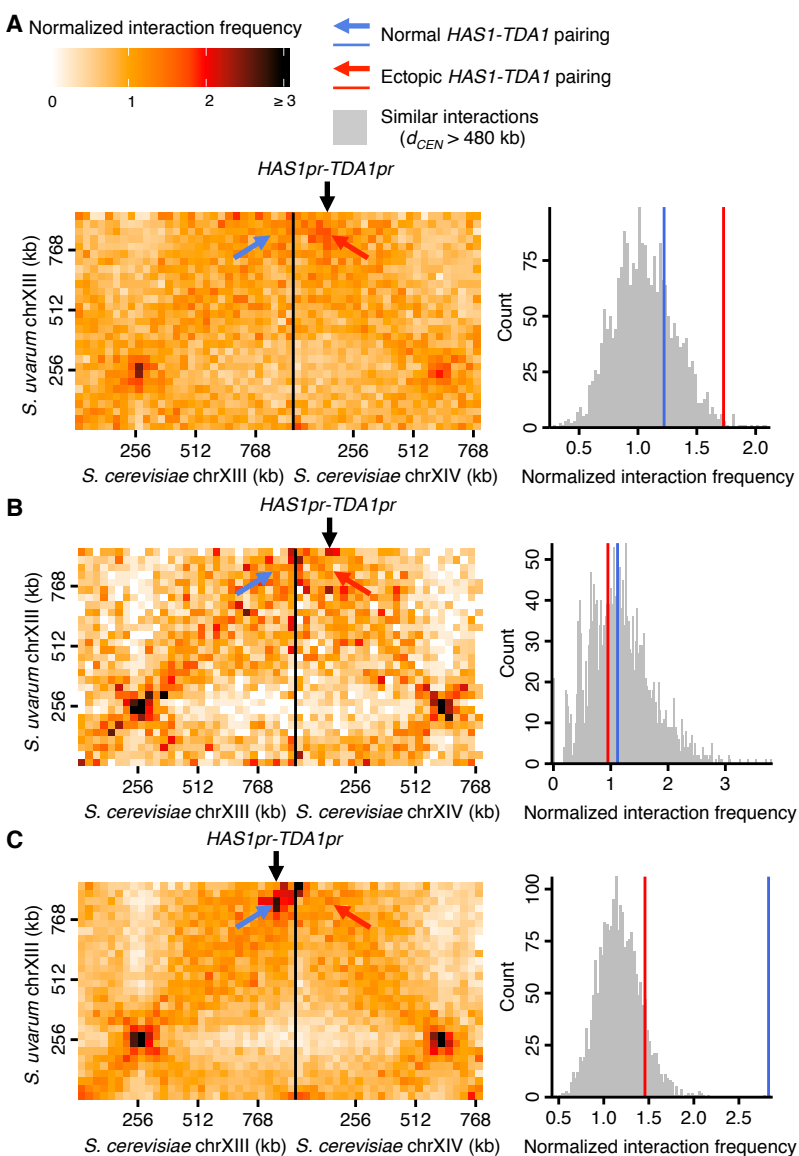

Supplement: supp [file elife-23623-supp-v1.zip]

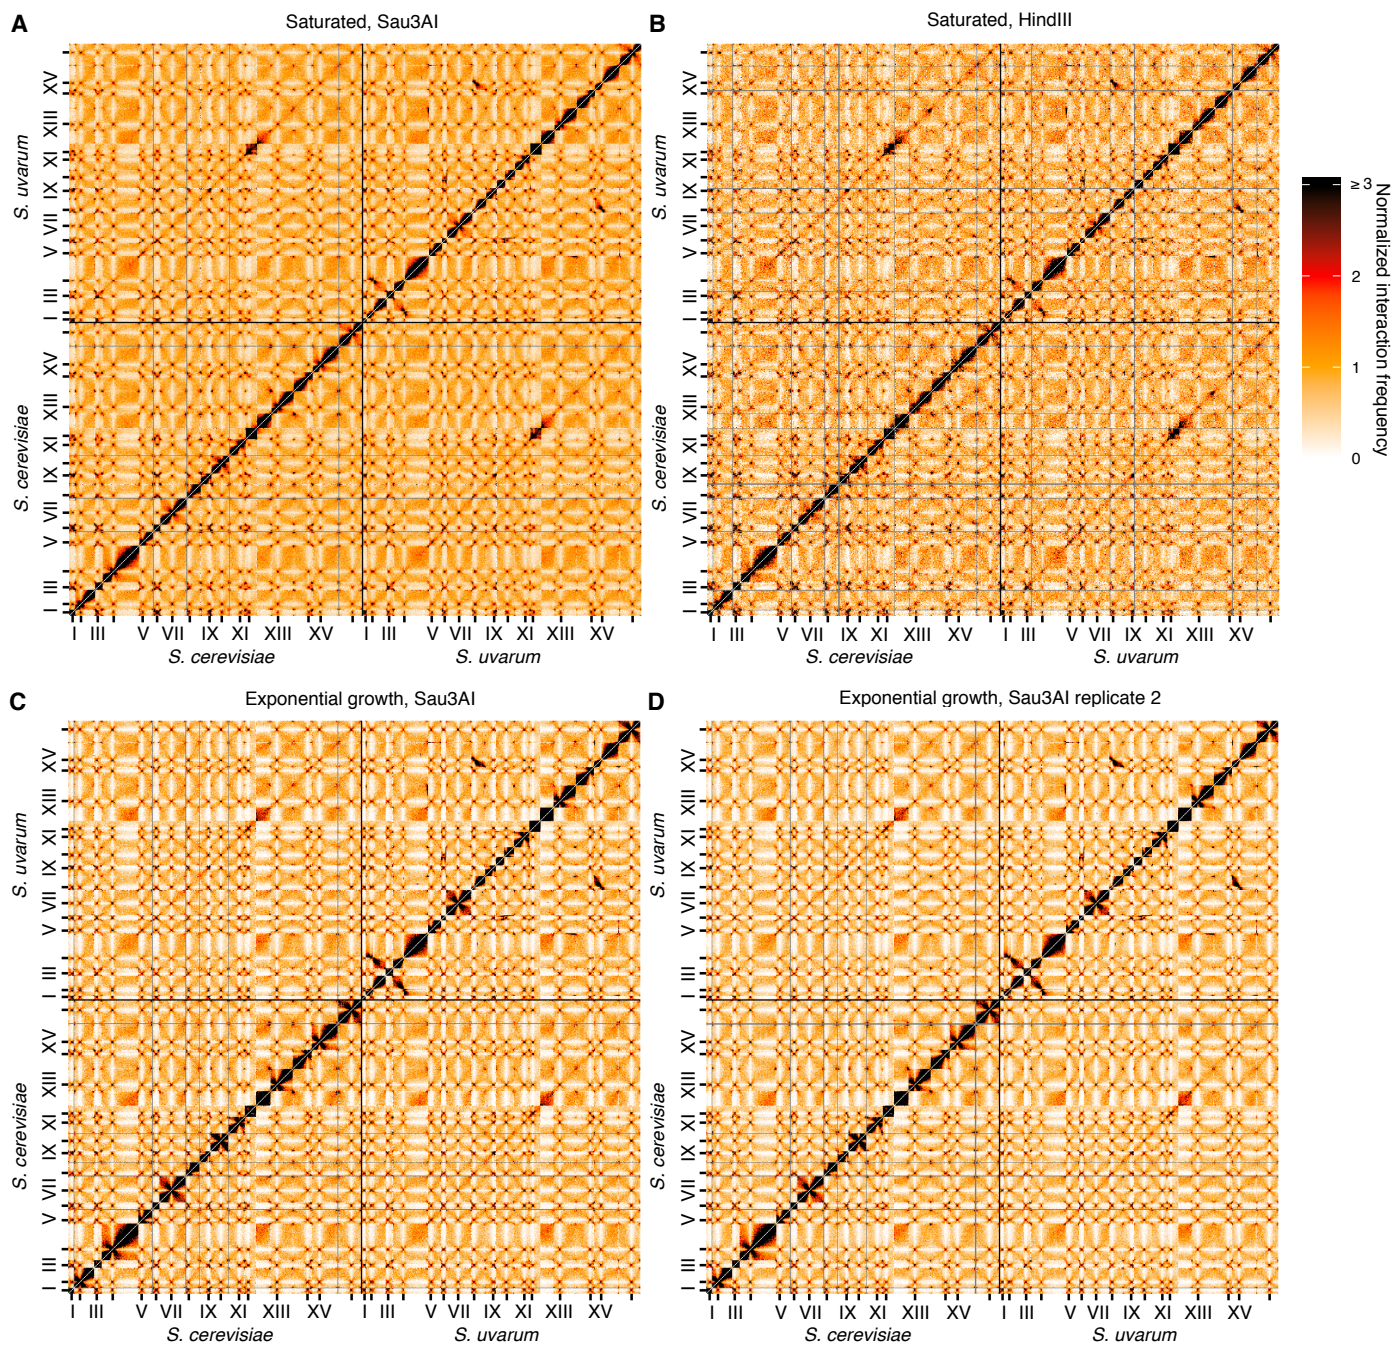

Supplement: supp [file elife-23623-supp-v1.zip]

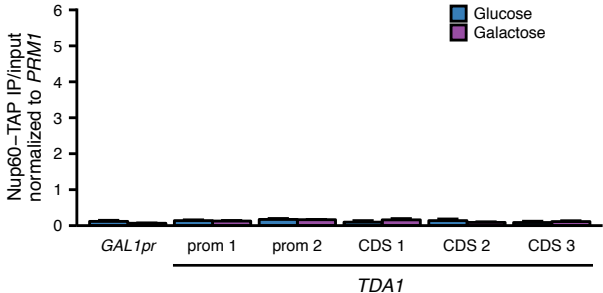

Supplement: supp [file elife-23623-supp-v1.zip]

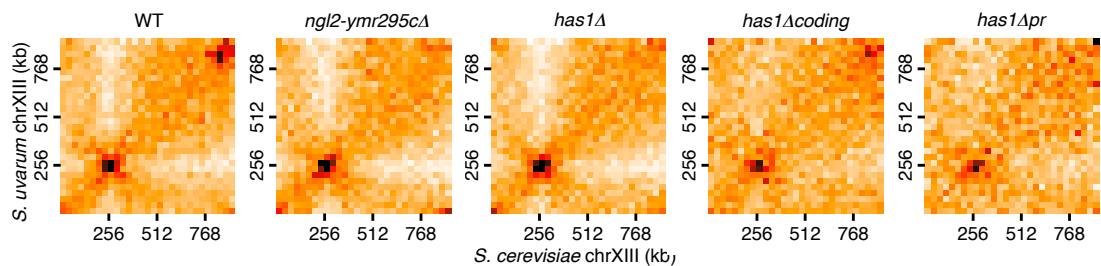

Supplement: supp [file elife-23623-supp-v1.zip]

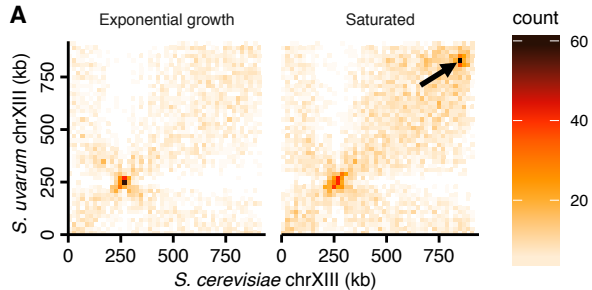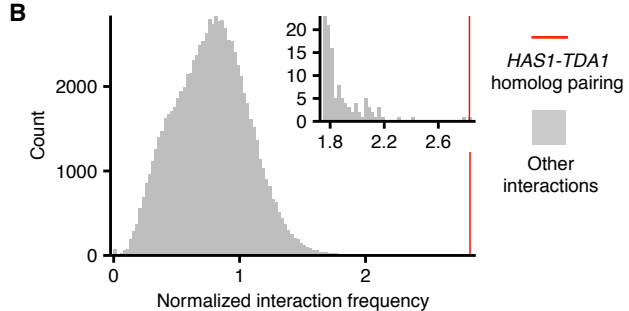

Supplement: supp [file elife-23623-supp-v1.zip]
